# Supplementary material for: Exposure of Mesenchymal Stem Cells to an Alzheimer’s Disease Environment Enhances Therapeutic Effects
Source: Hindawi journal article supplement (doi:10.1155/2021/6660186), 2021-03-16
Supplement: f3 [file 6660186.f3.pdf]

**(A)**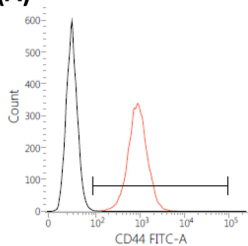**99.9 %**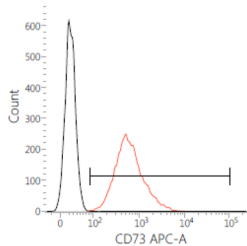**99.9 %**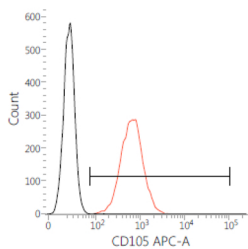**100.0 %**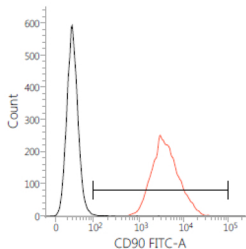**100.0 %****(B)**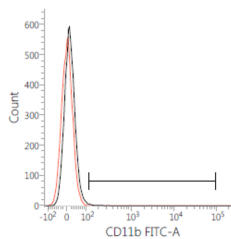**0.0 %**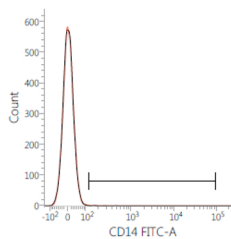**0.1 %**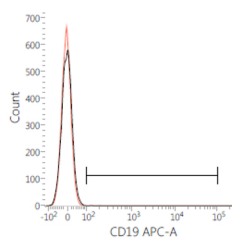**0.0 %**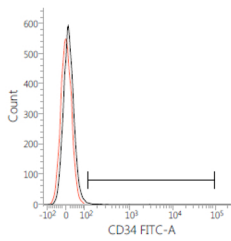**0.1 %**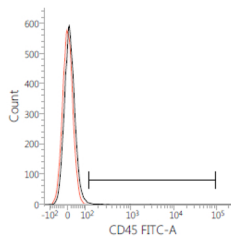**0.0 %**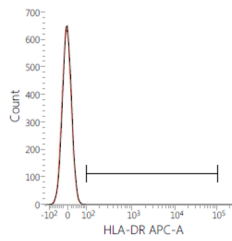**0.0 %**
