# Supplementary material for: Exposure of Mesenchymal Stem Cells to an Alzheimer’s Disease Environment Enhances Therapeutic Effects
Source: Hindawi journal article supplement (doi:10.1155/2021/6660186), 2021-03-16

**(A)**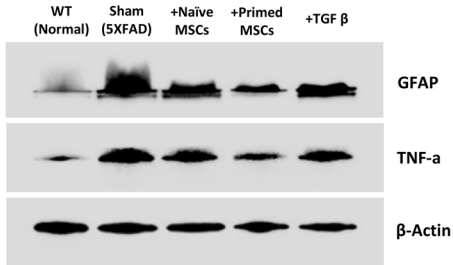**(B)**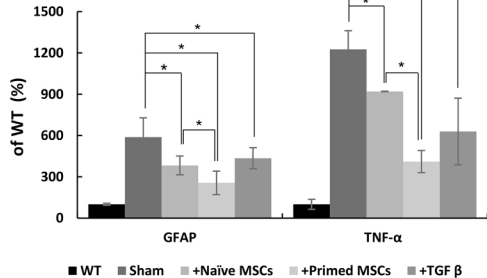

Supplement: f4 [file 6660186.f4.pdf]
